# Supplementary material for: Exploration of Polysaccharides from Phyllanthus emblica: Isolation, Identification, and Evaluation of Antioxidant and Anti-Glycolipid Metabolism Disorder Activities
Source: MDPI journal article supplement (doi:10.3390/molecules29081751), 2024-04-12
Supplement: s1 [file s1]

## Supplementary materials

### Study on Isolation, Identification, Antioxidant and Anti-Glycolipid Metabolism Disorder Activities of Polysaccharide from *Phyllanthus emblica*

Peng Guo<sup>1</sup>, Meng Chen<sup>1</sup>, Wenzhao Wang, Qiuyun Li, Xinyu Chen, Jiayue Liang, Yiyang He, Yanli Wu\*

Department of Organic Chemistry, College of Pharmacy, Harbin Medical University, Harbin, Heilongjiang 150081, China

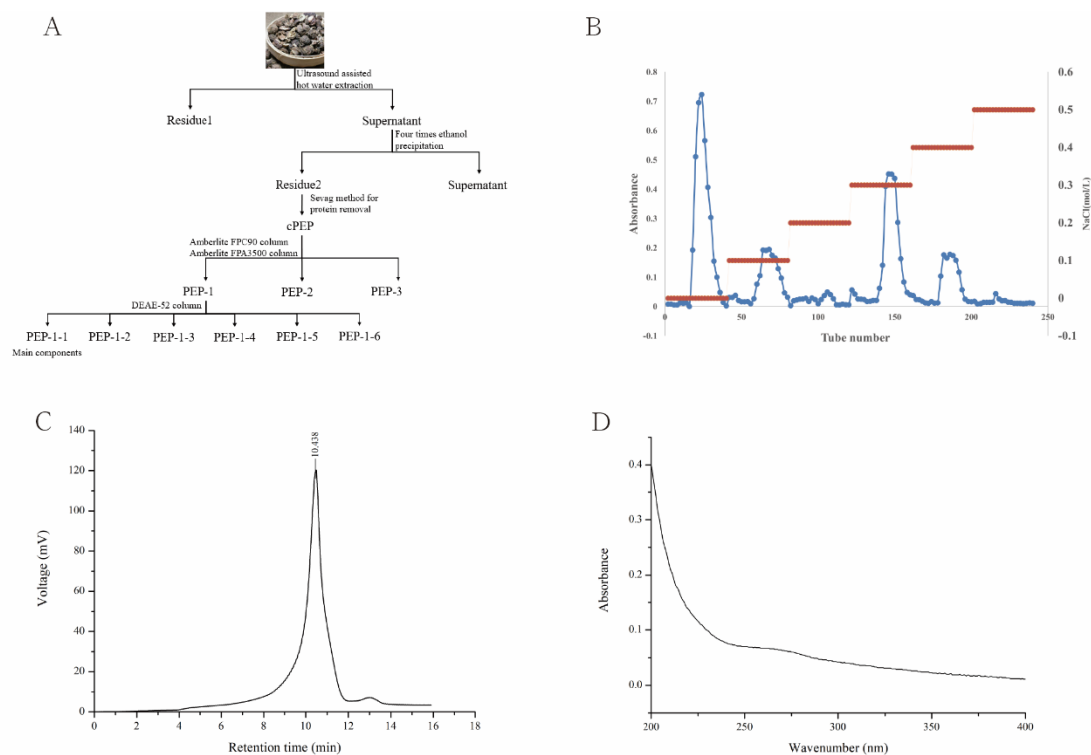

Fig.S1 Flow chart of *Phyllanthus emblica* polysaccharide extraction, separation, and purification of PEP (A); elution curve of PEP-1 on DEAE-52 column (B); the HPSEC chromatogram of PEP-1-1 (C); the UV chromatogram of PEP-1-1 (D).

**Table S1.**

The yield and productivity of purified products

| Name    | Eluent           | The yield of the product (g) | The productivity of the product (%) |
|---------|------------------|------------------------------|-------------------------------------|
| PEP-1   | H <sub>2</sub> O | 1.2918                       | 12.92                               |
| PEP-2   | 0.5 M NaCl       | 0.6244                       | 6.24                                |
| PEP-3   | 1 M NaCl         | 0.2514                       | 2.51                                |
| PEP-1-1 | H <sub>2</sub> O | 0.136                        | 11.33                               |
| PEP-1-2 | 0.1 M NaCl       | 0.054                        | 4.50                                |
| PEP-1-3 | 0.2 M NaCl       | 0.018                        | 1.50                                |
| PEP-1-4 | 0.3 M NaCl       | 0.026                        | 2.17                                |
| PEP-1-5 | 0.4 M NaCl       | 0.014                        | 1.21                                |
| PEP-1-6 | 0.5 M NaCl       | 0.006                        | 0.53                                |

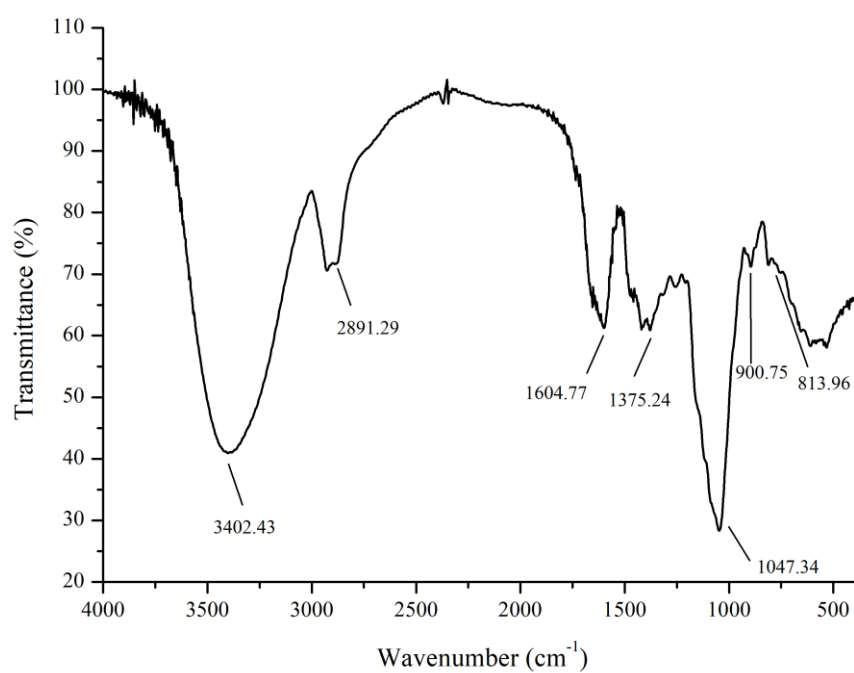

Fig.S2 FT-IR spectrum of PEP-1-1.

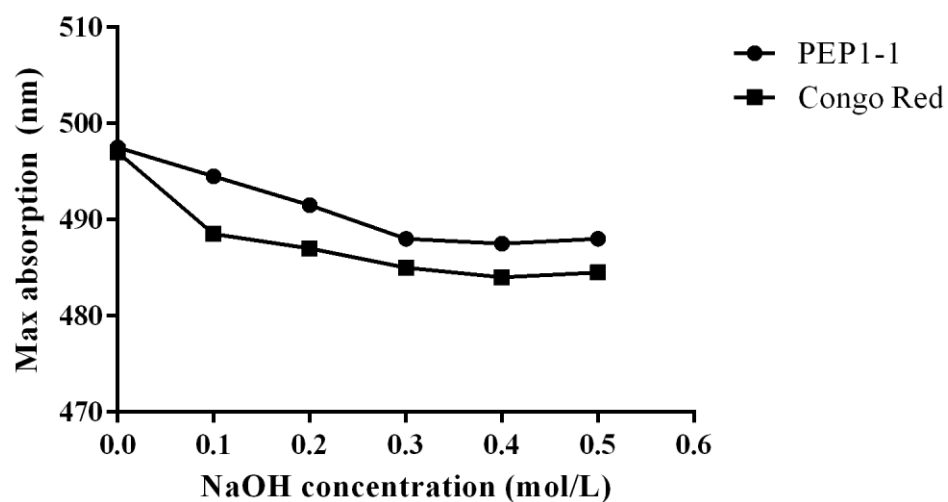

Fig.S3 Congo red test experimental results of PEP-1-1.

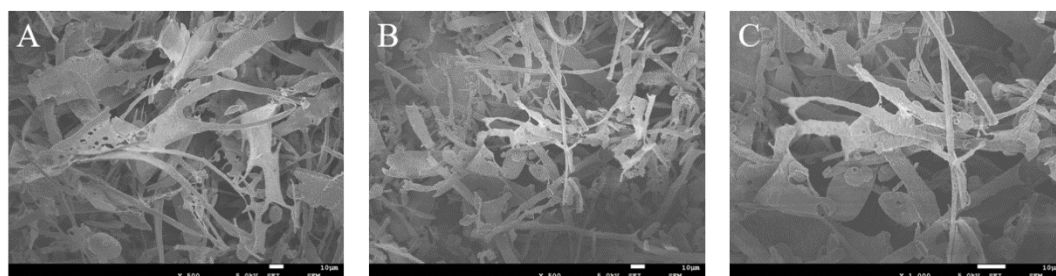

Fig.S4 Scanning electron micrographs of PEP-1-1 at magnification of 500 × (A), (B) and 1000 × (C).

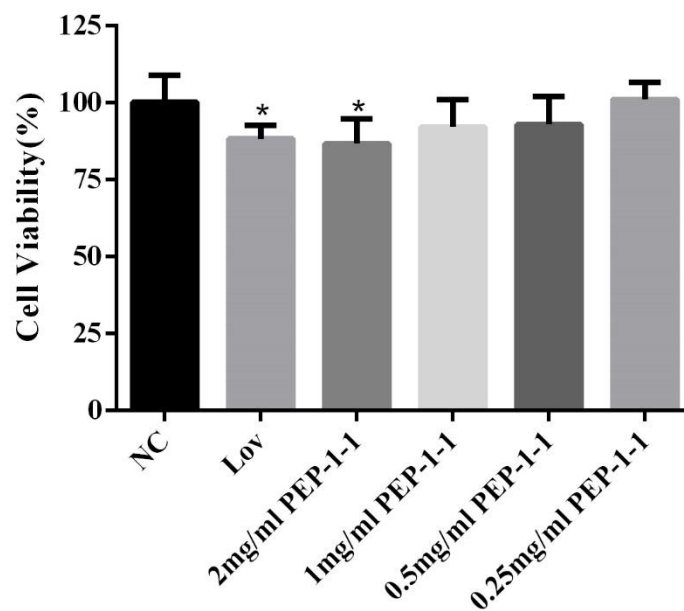

Fig.S5 Effects of PEP-1-1 on the cell viability. (n=6, \* indicated  $p < 0.05$  vs. NC group.)

Table S2.

Linkage patterns analysis of PEP-1-1

| Peak | RT (min) | Partially methylated alditol acetate (PMAA)                                     | Mass fragments ( <i>m/z</i> )        | Linkage types                |
|------|----------|---------------------------------------------------------------------------------|--------------------------------------|------------------------------|
| 1    | 21.358   | 1,4-Di- <i>O</i> -acetyl-2,3,5-tri- <i>O</i> -methyl-D-arabinitol               | 58,71,87,101,117,129,161             | T- $\alpha$ -L-Araf-(1-      |
| 2    | 24.893   | 1,4,5-Tri- <i>O</i> -acetyl-1-deuterio-2,3-di- <i>O</i> -methyl-D-arabinitol    | 58,71,87,101,117,129,161,189         | -5- $\alpha$ -L-Araf-(1-     |
| 3    | 26.621   | 1,2,5-Tri- <i>O</i> -acetyl-1-deuterio-3,4,6-tri- <i>O</i> -methyl-D-galactitol | 58,71,87,101,117,129,142,161,191,203 | -3,5)- $\alpha$ -L Araf -(1- |
| 4    | 28.192   | 1,3,5-Tri- <i>O</i> -acetyl-1-deuterio-2,4,6-tri- <i>O</i> -methyl-D-galactitol | 58,71,87,101,117,129,161,173,203,233 | -3- $\beta$ -D-Galp-(1-      |
